# Supplementary material for: Development and multiplexed control of latching pneumatic valves using microfluidic logical structures
Source: Royal Society of Chemistry journal article supplement (doi:10.1039/b518362f), 2006-01-01
Supplement: pressure.pdf [file pressure.pdf]

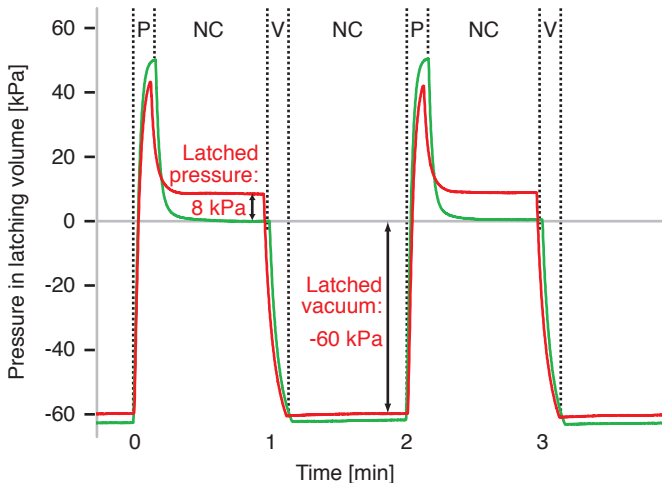

Supplementary data. Pressure measured inside the latching volume while actuating a V-latching (green) and PV-latching (red) valve with 10 s pressure (P) or vacuum (V) pulses (NC = no connection to valve). While both valves latch open in a similar fashion, only the PV-latching valve traps 8 kPa pressure in the latching volume to hold the valve closed against pressures in the fluidic system.
